# Supplementary material for: Microglia replacement by ER-Hoxb8 conditionally immortalized macrophages provides insight into Aicardi–Goutières syndrome neuropathology
Source: eLife. 2026 Jan 27;14:RP102900. doi: 10.7554/eLife.102900 (PMC12844908; doi:10.7554/eLife.102900)
Supplement: Figure 1—figure supplement 1—source data 1. [file elife-102900-fig1-figsupp1-data1.xlsx]

## Sheet: Sup. Figure1B
CD11B	BMD Macs	ER-Hoxb8 Macs
	30254	33209
CD45	BMD Macs	ER-Hoxb8 Macs
	241271	374795

## Sheet: Sup. Figure 1D
PC Beads	10% PS Beads		PC Beads				10% PS Beads
0.19	2.16		0	4	1	2	0	2	1	2
0.78	2.65		0	0	0	0	3	0	1	1
0.284	1.94		0	0	0	0	0	4	5	1
0.47	2.1		0	0	0	1	0	0	3	8
			4	6	0	0	11	1	0	1
			0	1	0	1	0	0	0	0
			0	2	1	0	0	1	0	0
			1	2	2	0	0	1	1	1
			1	3	0	0	4	3	2	3
			0	1	0	0	1	0	0	3
			0	0	0	1	5	0	0	0
			0	0	0	3	0	2	1	0
			0	0	0	0	0	1	4	1
			0	1	0	0	16	16	0	1
			0	0	0	1	14	6	0	0
			0	0	0	0	0	17	1	4
			0	0	0	0	0	5	5	0
			0	0	2	0	8	6	0	3
			0	0	1	0	0	1	1	8
			0	0	0	0	0	2	0	1
			0	0	0	0	2	0	0	4
			0	0	0	0	5	0	1	2
			0	0	0	1	0	3	2	0
			0	0	0	0	4	2	1	1
			0	1	0	0	0	3	0	1
			0	1	0	0	2	1	0	0
			2	2	0	0	3	0	15	3
			1	0	1	0	0	16	2	6
			0	0	0	0	0	1	0	0
			1	0	0	0	16	2	0	2
			1	0	0	0	0	2	7	4
			0	0	0	2	0	10	0	1
			0	0	0	0	0	1	0	6
			0	0	1	0	12	0	0	5
			0	1	1	0	2	4	0	0
			0	0	0	3	0	0	0	2
			0	0	0	0	0	4	2	0
			0	0	0	0	0	1	0	1
			0	0	0	0	0	1	0	9
			0	0	0	0	0	0	0	0
			0	1	0	0	1	0	0	0
			0	0	2	0	11	3	0	1
			0	0	0	0	1	0	0	2
			0	0	0	0	0	0	1	0
			1	0	2	0	0	6	0	1
			1	0	2	0	3	0	0	6
			1	0	0	0	0	0	8	5
			0	3	0	1	1	0	0	0
			0	1	0	3	0	6	0	0
			0	1	3	0	0	1	1	4
			0	3	0	0	0	0	3	0
			0	5	0	1	2	7	8	0
			0	1	0	0	0	3	1	1
			0	0	0	0	1	3	0	0
			0	0	0	0	9	1	2	0
			0	9	0	0	1	0	0	6
			0	1	0	0	2	0	12	0
			0	0	0	0	1	0	2	0
			0	0	2	0	0	0	0	6
			0	0	0	2	0	0	0	3
			1	0	0	0	1	7	3	0
			0	0	0	0	0	0	0	0
			0	0	0	0	0	3	0	0
			0	0	0	0	0	0	6	0
			0	1	0	0	0	2	2	0
			0	0	0	5	11	0	4	0
			0	0	0	1	1	12	0	1
			0	0	0	0	0	3	0	5
			0	6	0	0	3	0	6	1
			0	0	2	3	0	0	20	4
			0	0	0	0	0	0	4	8
			0	1	0	0	0	0	14	2
			0	0	0	0	3	0	1	12
			0	0	0	1	0	6	0	2
			0	0	0	2	8	3	0	3
			0	0	0	0	1	0	0	5
			0	0	0	0	0	12	6	0
			0	0	0	0	0	0	0	1
			3	0	0	0	9	0	0	4
			0	1	0	0	0	0	1	0
			0	1	0	1	1	1	0	2
			0	2		1	0	7	0	0
			0	0		0	1	5	3	0
			0	0		0	1	2	9	3
			0	0		0	1	4	0	3
			0	0		0	0	0	0	0
			0	0		1	0	0	0	1
			0	0		0	1	0	1	0
			0	0		0	2	7	0	0
			0	0		0	5	0	4	1
			0	3		3	1	0	0	1
			0	0		1	1	1	11	4
			0	0		1	0	0	0	11
			0	0		0	0	11	0	3
			0	0		0	0	0	1	2
			0	0		0	1	2	3	6
			0	6		1	5	12	2	4
			0	1		0	6	11	0	1
			0	2		2	12	3	0	0
			1	4		2	0	2	0	0

## Sheet: Sup. Figure 1E
	BM Prog	BM Mono	BMD Macs	ER-Hoxb8 Prog	4div ER-Hoxb8	ER-Hoxb8 Macs
Itgam	4.69424	7.61611	8.22509	7.45232	8.51259	7.711
Csf1r	6.07419	9.26029	11.2255	7.09457	10.1282	9.99426
Cx3cr1	4.89966	7.9468	7.55958	3.44221	9.0894	6.49491
Trem2	2.19316	5.28139	10.6584	4.97117	9.95277	10.5727
Emr1	3.72424	7.01424	9.9364	8.35239	9.30901	9.9366
Cd68	5.9555	8.95607	11.7181	9.22915	11.3282	12.1964
Cd14	4.29831	6.57826	10.0364	10.8107	11.6051	10.1336
Fcgr3	6.04577	9.16714	10.5114	9.03807	9.71449	9.88307
Mertk	-0.402751	1.92655	5.99749	3.33667	3.38803	5.20026
Msr1	2.31283	6.98406	9.17765	3.50426	8.87751	8.05477
Tlr4	3.0217	4.87424	7.41935	8.19507	7.84411	7.39802
Aif1	2.79544	6.00905	6.01737	1.43437	3.6576	4.20287
Ptprc	8.20589	9.72854	8.91751	9.25611	9.29802	9.37053
Kit	7.41348	4.00543	-2.75869	1.95861	0.43139	-0.696822

## Sheet: Sup. Figure 1G
	BM			ER-Hoxb8
B3galnt1	4.80616	4.1946	3.83466	-3.62044	-3.62044	-3.62044
Cadm1	6.39393	7.0944	7.66314	-2.41362	-2.29918	-2.47029
As3mt	4.41149	3.17701	3.5831	-3.62042	-3.62044	-3.62044
Cyp2j6	4.52128	4.73462	2.88517	-3.62044	-3.1886	-3.62044
Pcbp3	0.623081	2.63261	3.38284	-3.62044	-3.62044	-3.62044
Naprt	3.90876	3.99669	3.17805	-3.62044	-1.75608	-3.62044
Smpdl3a	7.78062	8.68752	8.33559	-0.129051	-0.234415	0.376638
Fkbp9	2.53551	2.63619	1.72634	-3.62044	-3.62044	-3.62044
Btbd3	2.78211	3.39904	3.58742	-3.62044	-2.35805	-3.62044
Tmem26	2.00977	3.24434	0.925128	-3.62044	-3.62044	-3.62044
