# Supplementary material for: Microglia replacement by ER-Hoxb8 conditionally immortalized macrophages provides insight into Aicardi–Goutières syndrome neuropathology
Source: eLife. 2026 Jan 27;14:RP102900. doi: 10.7554/eLife.102900 (PMC12844908; doi:10.7554/eLife.102900)
Supplement: Figure 1—source data 1. [file elife-102900-fig1-data1.xlsx]

## Sheet: Figure 1D
	BMD Macs	ER-Hoxb8 Macs
Itgam	8.22509	7.711
Csf1r	11.2255	9.99426
Cx3cr1	7.55958	6.49491
Trem2	10.6584	10.5727
Emr1	9.9364	9.9366
Cd68	11.7181	12.1964
Cd14	10.0364	10.1336
Fcgr3	10.5114	9.88307
Mertk	5.99749	5.20026
Msr1	9.17765	8.05477
Tlr4	7.41935	7.39802
Aif1	6.01737	4.20287
Ptprc	8.91751	9.37053
Kit	-2.75869	-0.696822
Cd3e	-3.93399	-4.29503
Cd8	-2.78212	-0.88362
Trbc1	-3.70574	-4.00247
Trbd1	-4.29503	-4.29503
Cd19	-3.32439	-3.54166
Ly6g	-4.00708	-4.09555
Ncr1	-4.29503	-3.60373
Klra8	-4.29503	-4.29503
