# Supplementary material for: Microglia replacement by ER-Hoxb8 conditionally immortalized macrophages provides insight into Aicardi–Goutières syndrome neuropathology
Source: eLife. 2026 Jan 27;14:RP102900. doi: 10.7554/eLife.102900 (PMC12844908; doi:10.7554/eLife.102900)
Supplement: Figure 2—source data 1. [file elife-102900-fig2-data1.xlsx]

## Sheet: Figure 2C
WT Microglia	Csf1r-/-	ICT BM	ICT ER-Hoxb8
100	0	100	32.02
100	0	100	83.4
100	0	19	18.42
100	0	64.79	0
100	0	90.98	44.31
	0	49.03	100
			87.34
			100

## Sheet: Figure 2E
WT Microglia	Csf1r -/-	ICT BM	ICT ER-Hoxb8
145.985	0	288.162	164.603
178.003	0	263.478	150.64
155.153	0	251.63	200.007
165.873	0	255.015	180.824
154.871	0	247.117	182.234
	0	282.097	151.768
