# Supplementary material for: Microglia replacement by ER-Hoxb8 conditionally immortalized macrophages provides insight into Aicardi–Goutières syndrome neuropathology
Source: eLife. 2026 Jan 27;14:RP102900. doi: 10.7554/eLife.102900 (PMC12844908; doi:10.7554/eLife.102900)
Supplement: Figure 3—figure supplement 1—source data 1. [file elife-102900-fig3-figsupp1-data1.xlsx]

## Sheet: Sup. Figure 2G
Hippocampus	WT Microglia	Csf1r -/-	ICT BM	ICT ER-Hoxb8
	3.31	2.76	2.251	1.433
	6.77	10.488	1.178	1.431
	1.53	5.63	1.62	3.536
Cortex	WT Microglia	Csf1r -/-	ICT BM	ICT ER-Hoxb8
	0.92	0.263	0.258	0.25
	0.354	0.98	0.275	0.26
	0.343	0.857	0.122	0.394
Midbrain	WT Microglia	Csf1r -/-	ICT BM	ICT ER-Hoxb8
	0.319	0.295	0.604	0.181
	0.373	0.89	0.0685	0.25
	0.263	0.615	0.275	0.639
Thalamus	WT Microglia	Csf1r -/-	ICT BM	ICT ER-Hoxb8
	0.372	0.15	0.128	0.169
	0.545	0.54	0.0873	0.257
	0.387	0.387	0.159	0.355
Corpus Callosum	WT Microglia	Csf1r -/-	ICT BM	ICT ER-Hoxb8
	25.977	7.76	5.382	24.07
	9.47	29.41	3.75	15.095
		27.38	6.496	14.31
