# Supplementary material for: Microglia replacement by ER-Hoxb8 conditionally immortalized macrophages provides insight into Aicardi–Goutières syndrome neuropathology
Source: eLife. 2026 Jan 27;14:RP102900. doi: 10.7554/eLife.102900 (PMC12844908; doi:10.7554/eLife.102900)
Supplement: Figure 3—source data 1. [file elife-102900-fig3-data1.xlsx]

## Sheet: Figure 2E
Bone Marrow		In Vitro			In Vivo						WT
	P2ry12	0.450544	-1.59643	3.31408	8.11076	9.43026	11.3907	10.9219	10.9685	10.5268	14.1473	14.29	14.4807	14.8419	14.5398	14.4138	14.2486
	Tmem119	3.32001	0.914709	5.03586	9.71752	10.3354	7.73699	9.5958	10.4861	10.043	12.6336	13.0566	12.1026	9.5217	9.51456	12.3589	12.0391
	Hexb	8.75983	8.81349	9.69851	11.9012	12.5002	13.5762	13.5124	13.685	13.5045	14.8487	15.3278	15.162	15.0173	15.5407	14.8402	15.0434
	Fcrls	7.84713	5.117	6.79898	7.4134	8.33322	9.41907	10.0829	10.5484	10.0589	9.87476	11.0778	10.1949	9.12279	8.79358	10.008	9.76262
	Gpr34	3.58402	0.88693	3.12526	9.21139	10.0228	11.666	11.0609	11.0036	10.9827	12.7216	12.8984	12.8339	13.5755	13.4958	12.7375	12.6748
	Olfml3	1.89273	-0.443279	4.21778	5.98485	7.5349	7.77051	7.99163	8.60802	8.19206	10.3262	10.8776	10.2367	9.50581	9.5137	10.3269	9.85563
	P2ry13	4.47638	2.83616	4.57542	9.62583	10.1506	10.5509	10.4832	10.9565	10.591	12.6189	12.9757	12.6156	12.2528	12.0569	12.7831	12.4378
	Siglech	-0.16441	-1.51519	1.26602	6.47939	7.37673	7.12666	7.16094	7.00093	6.92044	10.8076	11.1806	10.8085	10.8153	10.5206	10.7598	10.6001
	Sparc	0.0746223	-0.375501	1.35452	5.65053	6.65591	8.52351	8.40061	8.06409	7.94341	12.712	13.5316	13.3096	13.1253	12.7841	12.9403	13.0215
	Sall1	-2.97343	-2.49787	-1.7466	0.786544	0.377786	-1.25539	-0.032741	-1.0125	-0.107622	8.58041	8.35688	8.61165	8.60409	8.30685	8.66263	8.74467
ER-Hoxb8s		In Vitro			In Vivo						WT
	P2ry12	-1.30338	-1.8782	-3.08798	10.5671	10.5675	7.40033	6.98922	6.5893	4.76217	14.1473	14.29	14.4807	14.8419	14.5398	14.4138	14.2486
	Tmem119	6.70318	7.07104	5.38716	10.2078	9.30995	9.72104	7.26658	7.26534	4.13474	12.6336	13.0566	12.1026	9.5217	9.51456	12.3589	12.0391
	Hexb	9.24557	8.94416	7.62905	12.719	12.7761	12.2789	12.561	12.6815	9.6064	14.8487	15.3278	15.162	15.0173	15.5407	14.8402	15.0434
	Fcrls	4.09254	7.28523	-0.906279	9.21141	8.36786	4.81553	3.53045	3.38651	1.48833	9.87476	11.0778	10.1949	9.12279	8.79358	10.008	9.76262
	Gpr34	7.22933	6.31922	2.15169	10.0333	10.1091	8.28098	9.721	8.83285	5.25772	12.7216	12.8984	12.8339	13.5755	13.4958	12.7375	12.6748
	Olfml3	-1.3149	-2.87221	-2.75379	7.97519	7.74992	6.65928	5.71275	6.53076	2.97538	10.3262	10.8776	10.2367	9.50581	9.5137	10.3269	9.85563
	P2ry13	5.2827	4.42456	-2.41128	10.8687	10.1016	9.08908	8.74181	8.14101	7.65695	12.6189	12.9757	12.6156	12.2528	12.0569	12.7831	12.4378
	Siglech	-0.778718	-1.51901	-1.63805	7.42927	7.392	5.45419	5.40279	5.44646	1.431	10.8076	11.1806	10.8085	10.8153	10.5206	10.7598	10.6001
	Sparc	-2.00415	-1.43269	0.970022	8.6991	8.21875	6.7455	4.95909	5.95219	3.75393	12.712	13.5316	13.3096	13.1253	12.7841	12.9403	13.0215
	Sall1	-2.40333	-2.51722	-2.60621	2.65631	1.61734	1.2926	0.282907	-0.0110281	-0.383133	8.58041	8.35688	8.61165	8.60409	8.30685	8.66263	8.74467
