# Supplementary material for: Microglia replacement by ER-Hoxb8 conditionally immortalized macrophages provides insight into Aicardi–Goutières syndrome neuropathology
Source: eLife. 2026 Jan 27;14:RP102900. doi: 10.7554/eLife.102900 (PMC12844908; doi:10.7554/eLife.102900)
Supplement: Figure 4—figure supplement 1—source data 1. [file elife-102900-fig4-figsupp1-data1.xlsx]

## Sheet: Sup. Figure 3D
Cas9	NTC	TLR4 KO
21931	22515	560

## Sheet: Sup. Figure 3E
	Cas9				NTC2				TLR4 KO
Untreated	1.51192	0.92542	4.25311	3.58684	0.897703	1.07499	3.82064	3.40046	0.263334	0	2.90962	3.275
LPS	627.622	590.89	690.03	671.439	565.402	651.593	683.821	650.186	240.237	164.082	252.399	256.217
R848	753.529	701.16	711.638	695.925	646.321	706.26	621.123	578.947	745.275	559.584	679.754	743.944
