# Supplementary material for: Microglia replacement by ER-Hoxb8 conditionally immortalized macrophages provides insight into Aicardi–Goutières syndrome neuropathology
Source: eLife. 2026 Jan 27;14:RP102900. doi: 10.7554/eLife.102900 (PMC12844908; doi:10.7554/eLife.102900)
Supplement: Figure 4—figure supplement 2—source data 1. [file elife-102900-fig4-figsupp2-data1.xlsx]

## Sheet: Sup. Figure 4A
	In Vitro BM	In Vitro Hox	In Vivo BM	In Vivo Hox	In Vivo MG
Adar1	5.85845	5.38716	4.57496	5.08099	3.38151
Trex1	4.19875	4.16153	6.1035	7.34012	5.45626
Samhd1	7.16696	8.00887	7.94224	9.55893	6.28685
Rnaseh2a	5.41512	5.53764	4.1951	4.52845	3.9502
Rnaseh2b	5.07197	4.78889	4.24545	4.72293	3.89691
Rnaseh2c	3.56857	3.46081	4.73729	4.80058	4.30045
Ifih1	4.60292	4.93659	4.49995	7.14713	4.1394

## Sheet: Sup. Figure 4C
	Adar1-Mut2				NTC
0	212.778	236	206.889	203.667	404.889	357.556	318.222	293.556
3	638.111	586.111	893.667	883.111	528.222	968.889	1349.11	1349.78
6	832.556	399.444	629.778	734.556	1595.22	2273.11	2725	2955.56
9	655.111	495.556	773.889	882.556	1552	2523.33	3017.33	1922.89

## Sheet: Sup. Figure 4E
	Prog	Macs
Ccl2	1.35749	1.73207
Cxcl10	-0.389202	3.48978
Herc6	-0.252525	3.27389
Ifi44	1.06864	6.53479
Ifih1	-0.691623	2.57574
Ifit1	1.05129	7.13525
Ifit2	0.0668494	5.87776
Ifit3	3.41309	6.97581
Irf7	1.14174	5.76873
Isg15	-0.283437	4.27824
Isg20	-1.04308	2.87823
Oas1a	-0.482774	2.58218
Oas1g	-3.1667	3.89941
Oas2	0.245347	2.91178
Oas3	2.39179	5.24825
Rsad2	-0.597714	6.8218
Stat1	-0.366013	3.12876
Stat2	1.44652	3.53482
Usp18	1.15529	5.90531
Zbp1	-1.61674	3.88069

## Sheet: Sup. Figure 4F
	Adar1-Mut2 (Vehicle)				NTC (Vehicle)				Adar1-Mut2 (10uM Bari)				NTC (10uM Bari)
0	191.778	226.556	173.111	207.111	268.889	271.889	241.333	171.778	247.444	312.778	225.111	191.667	212	185.556	207.889	201.889
3	1375.44	927.444	731.667	461.556	1217.89	1376.44	1146.11	612	1886.89	2311.78	1996.78	1207.33	727.444	725.444	774.333	490.667
6	762.444	1041.89	436.444	242.778	2456.44	2708.44	2134.22	712.111	3294.56	3297	3031	1379.67	1414.89	1379	1435.22	620.778
9	456.222	706.556	605.778	607.333	3294.56	2606.22	2420.11	1876.78	4619.67	5149.11	4422.89	3708.56	2178.56	2099.44	2081.33	1152.78

## Sheet: Sup. Figure 4G
TNFa		NTC				Adar1 KO
	-Bari	36	43	44	48	28	32	22	28
	+Bari	28	35	38	47	28	26	20	30
MDC		NTC				Adar1 KO
	-Bari	5080	5234	1782	5920	419	463	809	715
	+Bari	1565	1849	890	6894	546	220	148	106
Fractalkine		NTC				Adar1 KO
	-Bari	146	164	129	148	127	98	119	132
	+Bari	127	142	130	133	115	122	115	131
IL-16		NTC				Adar1 KO
	-Bari	4234	5640	1954	4718	1549	859	1841	835
	+Bari	3190	4365	2062	5444	3194	2652	2197	1743
IL-17		NTC				Adar1 KO
	-Bari	92	109	111	95	69	57	57	68
	+Bari	56	62	54	88	29	31	45	36
IL-12p40		NTC				Adar1 KO
	-Bari	67	67	57	68	61	58	73	60
	+Bari	85	97	89	74	78	87	78	77
MIP-1a		NTC				Adar1 KO
	-Bari	2211	2505	3115	3078	3712	1907	1369	2113
	+Bari	720	867	949	2188	171	112	112	102
MIP-1b		NTC				Adar1 KO
	-Bari	10624	10684	10131	11515	8121	6849	5762	6899
	+Bari	5531	5380	5292	12014	1135	794	711	677
MIP-2		NTC				Adar1 KO
	-Bari	10624	10684	10131	11515	8121	6849	5762	6899
	+Bari	5531	5380	5292	12014	1135	794	711	677
M-CSF		NTC				Adar1 KO
	-Bari	10624	10684	10131	11515	8121	6849	5762	6899
	+Bari	5531	5380	5292	12014	1135	794	711	677

## Sheet: Sup. Figure 4I
TNFa	NTC	A1	dKO
	43	19	31
	46	17	26
	44	17	23
	44	18	23
IL-17	NTC	A1	dKO
	85	40	68
	65	38	56
	76	30	56
	53	40	51
MIP-1a	NTC	A1	dKO
	5064	859	1413
	3844	535	702
	4152	729	1155
	4672	850	1158
MIP-1b	NTC	A1	dKO
	14366	6659	11860
	13363	4058	8596
	12842	4534	8520
	11890	5534	9705
MIP-2	NTC	A1	dKO
	82	10	101
	117	12	78
	96	11	90
	103	10	96
M-CSF	NTC	A1	dKO
	15564	20386	16808
	17689	22906	18882
	14192	18976	18591
	16649	17855	15245
