# Supplementary material for: Microglia replacement by ER-Hoxb8 conditionally immortalized macrophages provides insight into Aicardi–Goutières syndrome neuropathology
Source: eLife. 2026 Jan 27;14:RP102900. doi: 10.7554/eLife.102900 (PMC12844908; doi:10.7554/eLife.102900)
Supplement: Figure 4—source data 1. [file elife-102900-fig4-data1.xlsx]

## Sheet: Figure 4B
	Adar1-Mut1				NTC
0	149.333	206	203.667	128.889	404.889	357.556	318.222	293.556
3	381.667	379.778	351.111	330	528.222	968.889	1349.11	1349.78
6	461.222	416.778	315.556	346	1595.22	2273.11	2725	2955.56
9	341	388.889	331.111	297.556	1552	2523.33	3017.33	1922.89

## Sheet: Figure 4F
	Prog	Macs
Ccl2	0.5	5.3
Cxcl10	0.1	3.5
Herc6	-0.2	3.5
Ifi44	0.2	7.6
Ifih1	-0.1	2.6
Ifit1	-1.1	6.2
Ifit2	-0.6	5.6
Ifit3	0.8	6.3
Irf7	0.529626	5.64231
Isg15	-0.1	4.7
Isg20	-0.3	3.8
Oas1a	-0.4	2.5
Oas1g	0.7	4.2
Oas2	-1.5	2.7
Oas3	-0.3	3.9
Rsad2	-0.2	7.1
Stat1	0	3.7
Stat2	0.3	2.5
Usp18	-1.5	5.5
Zbp1	-0.756085	4.69033

## Sheet: Figure 4G
	NTC	Adar1 KO	NTC + Bari	Adar1 KO
Aif1	9.98193	9.02177	9.17585	8.26214
Csf1r	10.5597	10.0533	10.6697	9.79884
Cx3cr1	10.1223	9.49614	10.3456	9.43796
Trem2	10.5251	10.4661	10.1374	10.316
Emr1	9.47561	9.14159	8.42791	8.9584
Cd68	11.245	10.9673	10.8977	10.8621
Cd14	11.9247	11.6481	12.1148	11.7939
Fcgr3	9.79208	10.1687	9.77755	10.2787
Mertk	3.01335	3.48425	2.54647	3.49738
Msr1	9.13439	9.58709	9.34851	9.50265
Tlr4	7.86875	6.9636	7.37649	6.89076
Itgam	9.98193	9.05677	9.17585	8.89524
Ptprc	9.85423	10.2378	9.74863	10.1696
Kit	-2.11843	-2.06013	-2.78093	-2.78093
Cd3e	-2.78093	-2.78093	-2.78093	-2.78093
Cd8	-1.96586	-1.67826	-1.64515	-1.55731
Trbc1	-2.78093	-2.78093	-2.78093	-2.78093
Trbd1	-2.78093	-2.78093	-2.78093	-2.78093
Cd19	-2.78093	-2.78093	-2.78093	-2.78093
Ly6g	-2.78093	-2.52706	-2.78093	-2.57972
Ncr1	-2.78093	-2.78093	-2.78093	-2.78093
Klra8	-2.78093	-2.78093	-2.78093	-2.78093

## Sheet: Figure 4H
	0uM Bari	0.006uM Bari	0.16uM Bari	0.4uM Bari	10uM Bari
Ccl2	1.26	1.42316	2.06096	2.24669	0.885311
Cxcl10	3.90973	3.07051	3.84474	3.67156	0.906936
Herc6	2.48256	2.39032	2.79665	1.52371	0.212006
Ifi44	8.00081	8.76825	8.58612	1.02617	-0.952304
Ifih1	2.35201	2.29501	3.10275	1.46223	0.0597466
Ifit1	7.23807	6.92378	7.90134	4.60013	1.45282
Ifit2	5.85734	5.67821	6.26742	3.77479	-0.192242
Ifit3	7.56465	7.65444	8.93357	5.0436	1.17361
Irf7	5.65706	5.30575	6.7845	3.298	-1.02712
Isg15	4.21528	4.4315	5.64126	2.74007	0.180723
Isg20	2.53358	3.41116	4.06156	2.27704	0.746521
Oas1a	2.04873	2.06892	3.16784	1.74668	-0.0626615
Oas1g	3.9387	4.38984	6.23395	3.76672	-0.866465
Oas2	3.27351	2.45258	4.89859	3.24323	0.682054
Oas3	3.66993	2.86691	4.73725	2.46385	-2.3152
Rsad2	7.1716	7.09648	8.49141	2.78097	0.764499
Stat1	3.4368	3.47537	4.28242	2.18658	-0.0422573
Stat2	2.8108	2.34787	2.76847	1.33059	-1.28613
Usp18	4.94601	5.015	7.58637	4.44766	-0.0478293
Zbp1	4.48829	4.74864	6.32489	3.14768	1.02208

## Sheet: Figure 4I
	Adar1-Mut1 (Vehicle)				NTC (Vehicle)				Adar1-Mut1 (10uM Bari)				NTC (10uM Bari)
0	119.444	146.222	75.1111	128.667	268.889	271.889	241.333	171.778	295.667	336.889	356.889	298.889	212	185.556	207.889	201.889
3	273.667	246.444	197.222	217.889	1217.89	1376.44	1146.11	612	620.556	604.333	495.111	238.444	727.444	725.444	774.333	490.667
6	305.667	274.111	249.556	254.333	2456.44	2708.44	2134.22	712.111	792.111	749	900.333	456.111	1414.89	1379	1435.22	620.778
9	334.778	351.444	303.444	291.222	3294.56	2606.22	2420.11	1876.78	1366.22	1821.11	1000.22	945.778	2178.56	2099.44	2081.33	1152.78

## Sheet: Figure 4J
IFNy		NTC				Adar1 KO
	-Bari	474	618	480	518	556	587	699	671
	+Bari	423	527	465	426	509	568	611	582
IFNb		NTC				Adar1 KO
	-Bari	8	7	8	6	114	79	63	83
	+Bari	5	7	5	8	6	7	7	9
CXCL10		NTC				Adar1 KO
	-Bari	1509	1043	1234	898	9230	7462	5469	4776
	+Bari	263	381	400	844	417	442	404	410
IL-6		NTC				Adar1 KO
	-Bari	39	44	57	44	272	119	106	100
	+Bari	42	36	38	36	30	27	35	33
CCL5		NTC				Adar1 KO
	-Bari	112	127	106	113	2871	1010	843	912
	+Bari	109	138	83	118	119	93	156	97

## Sheet: Figure 4K
	Adar1-Mut1				Adar1-Mut1 + IFIH1-Mut				NTC
0	149.333	206	203.667	128.889	322.222	394.111	318.111	289.778	404.889	357.556	318.222	293.556
3	381.667	379.778	351.111	330	457.778	775.556	912	989.444	528.222	968.889	1349.11	1349.78
6	461.222	416.778	315.556	346	1045.22	1469.56	1857.33	1988.56	1595.22	2273.11	2725	2955.56
9	341	388.889	331.111	297.556	1118.22	1678.11	1906.44	2153	1552	2523.33	3017.33	1922.89

## Sheet: Figure 4L
IFNy	NTC	A1	dKO
	232	215	180
	214	259	251
	215	196	218
	206	228	190
IFNb	NTC	A1	dKO
	8	44	9
	9	44	8
	10	31	8
	9	45	9
IL6	NTC	A1	dKO
	24	42	26
	17	36	21
	18	36	18
	20	41	17
CCL5	NTC	A1	dKO
	84	607	70
	87	533	62
	77	413	62
	99	966	64
CXCL10	NTC	A1	dKO
	1212	4146	2547
	1665	3307	1697
	1826	1755	1859
	831	2155	1631
