# Supplementary material for: Microglia replacement by ER-Hoxb8 conditionally immortalized macrophages provides insight into Aicardi–Goutières syndrome neuropathology
Source: eLife. 2026 Jan 27;14:RP102900. doi: 10.7554/eLife.102900 (PMC12844908; doi:10.7554/eLife.102900)
Supplement: Figure 5—figure supplement 1—source data 1. [file elife-102900-fig5-figsupp1-data1.xlsx]

## Sheet: Sup. Figure 5A
# Branches per Cell					Avg Branch Length per Cell					Longest Branch per Cell					Soma Size
Control Cells		GFP+ Adar1/Ifih1 dKO ER-Hoxb8			Control Cells		GFP+ Adar1/Ifih1 dKO ER-Hoxb8			Control Cells		GFP+ Adar1/Ifih1 dKO ER-Hoxb8			Control Cells		GFP+ Adar1/Ifih1 dKO ER-Hoxb8
5	3	3	1		9.893	11.3337	11.9665	15.0217		14.0078	12.3149	14.2132	15.0217		39.889	49.576	86.047	152.148
5	4	1	2		7.2165	15.5555	16.3137	24.7214		8.48685	19.7342	16.3137	30.4635		31.911	57.554	187.479	142.461
2	3	0	0		13.4204	10.4314	0*	0*		17.4159	14.0078	0*	0*		19.945	23.933	137.902	114.539
6	0	2	2		12.5181	0*	18.0413	17.4159		16.9737	0*	22.5705	17.7286		46.157	77.499	78.639	141.891
4	4	2	3		10.5438	10.8755	17.5991	15.665		12.5739	14.3964	21.6861	19.7342		43.308	66.102	225.658	190.898
5	4	1	2		10.5184	13.2317	16.8978	17.4048		14.8922	15.1513	16.8978	22.182		52.996	63.823	211.982	182.35
5	2	2	5		11.3769	9.36014	14.1753	19.1044		15.6471	13.3825	15.4639	24.5003		34.761	37.04	80.348	230.787
2	4	0	5		13.1345	12.6789	0*	20.6704		14.1373	19.4752	0*	35.8994		66.102	24.503	197.736	128.215
3	1	1	1		11.5421	15.6471	19.4215	21.2439		15.2049	15.6471	19.4215	21.2439		29.062	42.168	160.126	182.92
3	6	1	0		8.65213	10.3398	17.1569	0*		9.55441	14.3205	17.1569	0*		20.514	47.867	151.009	129.355
5	2	0	1		9.83046	11.8727	0	24.813		12.0022	14.3205	0*	24.813		35.9	62.113	133.913	120.807
3	2	2	2		17.2358	20.3327	22.7537	18.7582		34.6801	25.3847	26.0859	20.23		35.9	42.168	123.656	166.964
5	2	0	2		8.56012	9.86709	0*	16.4399		11.6895	10.7515	0*	18.0413		26.783	37.04	168.104	140.182
2	2	1	2		9.64599	11.3769	10.1261	15.9709		9.99661	13.3825	10.1261	17.8581		27.922	46.157	224.519	134.483
5	4	2	1		8.86207	8.33837	14.9681	15.6471		15.7766	10.6756	15.4103	15.6471		35.9	46.157	112.259	90.035
6	2	1	0		12.6134	9.71075	26.3449	0*		19.2383	10.4925	26.3449	0*		40.459	41.029	169.244	131.064
3	2	2	0		9.55441	10.7515	10.2445	0*		11.3769	11.3769	12.0022	0*		26.783	35.33	125.366	109.41
3	2	0	0		14.3279	18.7314	0*	0*		17.4159	24.8352	0*	0*		32.481	37.61	110.55	131.064
1	5	0	0		14.5795	8.52348	0*	0*		14.5795	10.622	0*	0*		42.738	48.437	118.528	63.381
5	4	2	0		8.53421	10.6733	17.1569	0*		9.99661	16.0357	17.9117	0*		54.705	42.738	135.053	79.778
					*Excluded cells with no branches					*Excluded cells with no branches
