# Supplementary material for: Microglia replacement by ER-Hoxb8 conditionally immortalized macrophages provides insight into Aicardi–Goutières syndrome neuropathology
Source: eLife. 2026 Jan 27;14:RP102900. doi: 10.7554/eLife.102900 (PMC12844908; doi:10.7554/eLife.102900)
Supplement: Figure 5—source data 1. [file elife-102900-fig5-data1.xlsx]

## Sheet: Figure 5E
Control Cells	Adar1 KO (#1)	Adar1 KO (#2)	Adar1/Ifih1 dKO
100	0	0	0
100	0	0	0
100	0	0	0
58.44	0	0
34.05	0
75.7	0
16.27	0
13.47	0
0.71	0
42.4	0
	0
	0
	0
	0
	0
	0
