# Supplementary material for: Microglia replacement by ER-Hoxb8 conditionally immortalized macrophages provides insight into Aicardi–Goutières syndrome neuropathology
Source: eLife. 2026 Jan 27;14:RP102900. doi: 10.7554/eLife.102900 (PMC12844908; doi:10.7554/eLife.102900)
Supplement: Figure 6—source data 1. [file elife-102900-fig6-data1.xlsx]

## Sheet: Figure 6A
	WT				Adar1 D1113H
0	329.444	409	420.889	416.667	265.667	242.333	257.222	176.556
3	665.333	947.556	1123.56	1097.78	894.889	1455.67	1624.67	1520.78
6	3278.22	4275.89	4692.33	5102	3754.56	4115.78	4810.89	5645.89

## Sheet: Figure 6B
IFNy	WT	D1113H
	251	178
	244	177
	226	164
	224	260
IFNb	WT	D1113H
	8	17
	7	23
	7	19
	6	19
CXCL10	WT	D1113H
	2837	12188
	2533	15021
	2102	14409
	1752	14239
CXCL1	WT	D1113H
	25	68
	19	79
	22	57
	19	59
CCL5	WT	D1113H
	57	95
	84	118
	58	132
	63	104
VEGF	WT	D1113H
	23	102
	19	94
	23	84
	19	171
MIP-1a	WT	D1113H
	91	283
	83	170
	88	159
	93	195
MIP-1b	WT	D1113H
	625	2021
	601	1335
	455	1491
	505	2670
